# Supplementary material for: Crystal Structure of New 1-Phenyl-Substituted Tribenzsilatranes
Source: MDPI journal article supplement (doi:10.3390/cryst13050772), 2023-05-06
Supplement: s1 [file s1]

Supplementary Information

## Crystal Structure of New 1-Phenyl Substituted Tribenzsilatrane

V. Romanovs, S. Belyakov, E. Doronina, V. Sidorkin, T. Roisnel, V. Jouikov

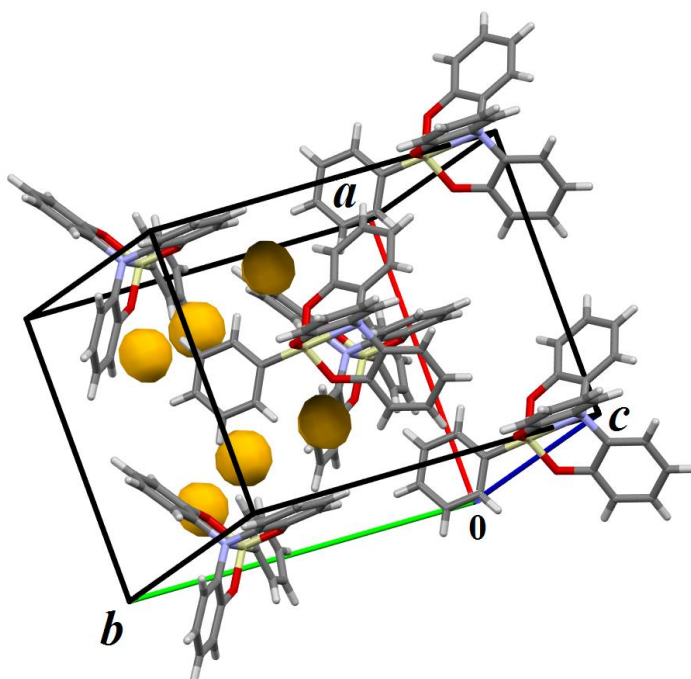

**Figure S1.** The voids in the molecular packing of **2a**.

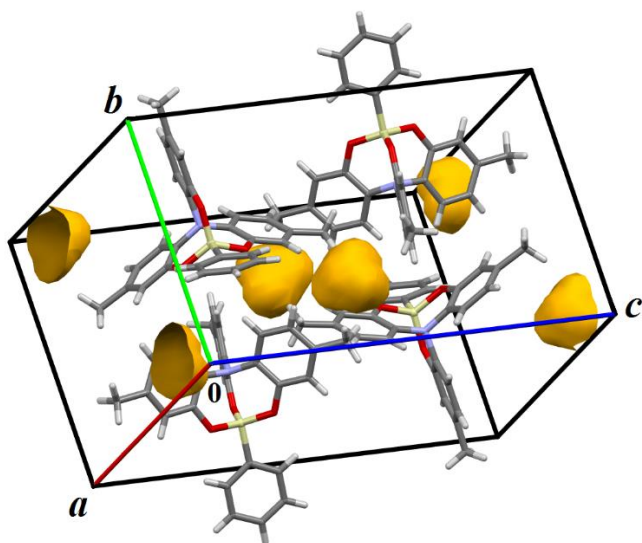

**Figure S2.** The voids in the molecular packing of **2b**.

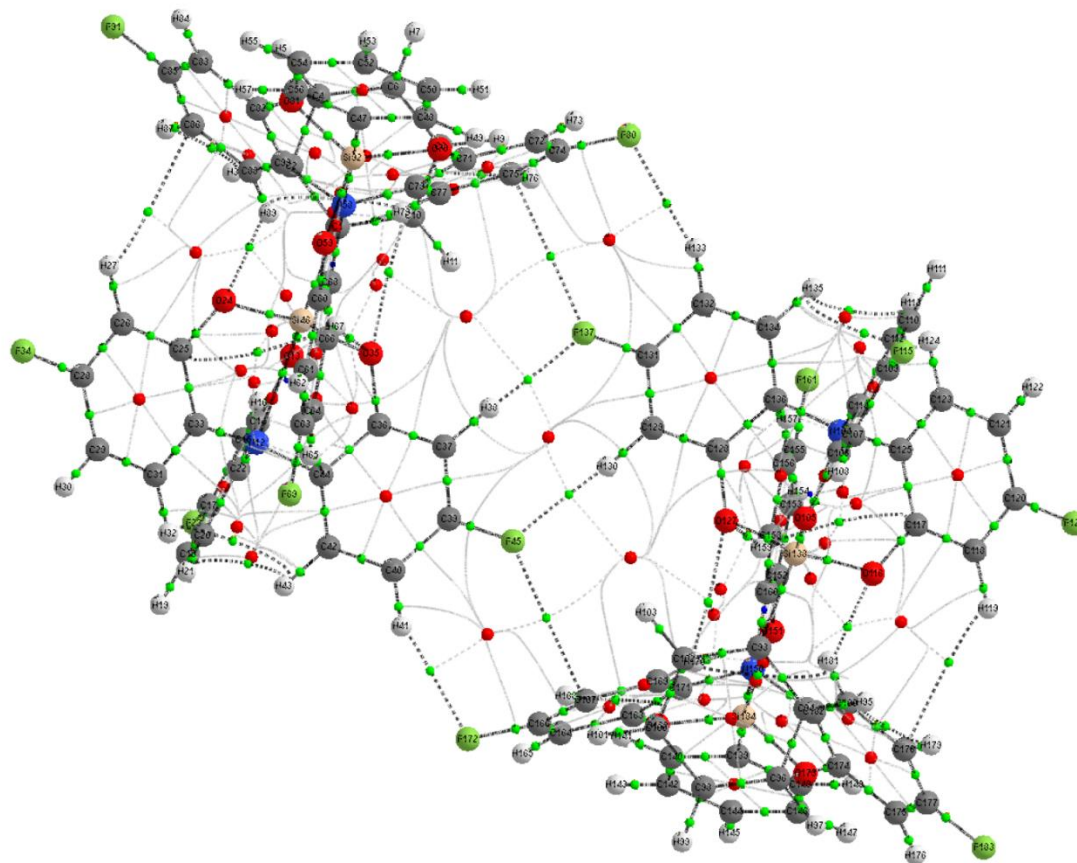

**Figure S3.** Crystal cell graph for **2c** from AIM analysis. Small green spheres represent bond critical points  $bcp(3, -1)$ , red spheres are ring critical points  $rcp(3, 1)$ .

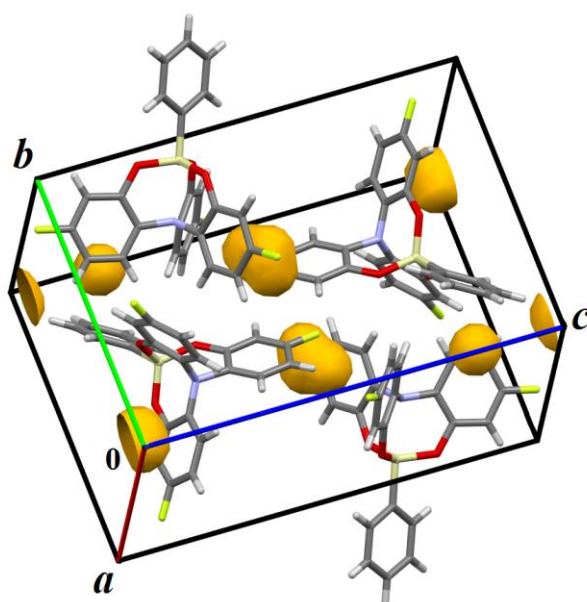

**Figure S4.** The voids in the molecular packing of **2c**.

**Table S1.** XRD Experimental and B3PW91/6-311++G(d,p) calculated (*italics*) selected geometric parameters of molecules **2a-c** (bond lengths in Å, angles in °).

| Parameter      | <b>2a</b> |              | <b>2b</b> |              | <b>2c</b> |              |
|----------------|-----------|--------------|-----------|--------------|-----------|--------------|
|                | exp.      | <i>calc.</i> | exp.      | <i>calc.</i> | exp.      | <i>calc.</i> |
| Si1–O2         | 1.654(8)  | <i>1.681</i> | 1.657(2)  | <i>1.684</i> | 1.655(2)  | <i>1.683</i> |
| Si1–O8         | 1.645(6)  | <i>1.683</i> | 1.663(2)  | <i>1.682</i> | 1.658(2)  | <i>1.682</i> |
| Si1–O9         | 1.645(6)  | <i>1.682</i> | 1.658(2)  | <i>1.682</i> | 1.660(2)  | <i>1.681</i> |
| Si1–C12        | 1.863(11) | <i>1.861</i> | 1.850(3)  | <i>1.863</i> | 1.852(3)  | <i>1.857</i> |
| O2–C3          | 1.342(14) | <i>1.353</i> | 1.370(4)  | <i>1.353</i> | 1.369(4)  | <i>1.349</i> |
| O8–C7          | 1.341(8)  | <i>1.352</i> | 1.372(4)  | <i>1.353</i> | 1.366(4)  | <i>1.349</i> |
| O9–C10         | 1.341(8)  | <i>1.352</i> | 1.374(4)  | <i>1.353</i> | 1.365(4)  | <i>1.349</i> |
| C3–C4          | 1.400(15) | <i>1.399</i> | 1.387(4)  | <i>1.398</i> | 1.392(4)  | <i>1.400</i> |
| C6–C7          | 1.390(11) | <i>1.399</i> | 1.376(4)  | <i>1.398</i> | 1.388(4)  | <i>1.400</i> |
| C10–C11        | 1.390(11) | <i>1.399</i> | 1.381(4)  | <i>1.397</i> | 1.390(4)  | <i>1.400</i> |
| N5–C4          | 1.443(13) | <i>1.438</i> | 1.446(4)  | <i>1.440</i> | 1.444(4)  | <i>1.437</i> |
| N5–C6          | 1.426(8)  | <i>1.439</i> | 1.451(4)  | <i>1.438</i> | 1.449(4)  | <i>1.436</i> |
| N5–C11         | 1.426(8)  | <i>1.438</i> | 1.458(4)  | <i>1.439</i> | 1.441(4)  | <i>1.436</i> |
| O2–Si1–O8      | 117.1(3)  | <i>115.0</i> | 116.0(1)  | <i>115.4</i> | 116.2(1)  | <i>114.7</i> |
| O2–Si1–O9      | 117.1(3)  | <i>116.8</i> | 117.8(1)  | <i>115.2</i> | 116.3(1)  | <i>114.6</i> |
| O8–Si1–O9      | 117.2(5)  | <i>115.1</i> | 117.5(1)  | <i>117.1</i> | 116.8(1)  | <i>116.5</i> |
| O2–Si1–C12     | 100.3(4)  | <i>102.1</i> | 98.9(1)   | <i>102.2</i> | 102.5(1)  | <i>103.2</i> |
| O8–Si1–C12     | 99.7(3)   | <i>102.6</i> | 101.2(1)  | <i>101.7</i> | 101.2(1)  | <i>102.6</i> |
| O9–Si1–C12     | 99.7(3)   | <i>102.1</i> | 99.7(1)   | <i>101.7</i> | 99.5(1)   | <i>102.5</i> |
| Si1–O2–C3      | 126.3(7)  | <i>126.4</i> | 125.7(2)  | <i>126.1</i> | 125.9(2)  | <i>126.8</i> |
| Si1–O8–C7      | 125.3(6)  | <i>126.2</i> | 124.5(2)  | <i>126.2</i> | 126.1(2)  | <i>127.0</i> |
| Si1–O9–C10     | 125.3(6)  | <i>126.3</i> | 124.9(2)  | <i>126.2</i> | 126.1(2)  | <i>127.0</i> |
| O2–C3–C4       | 118.2(11) | <i>119.7</i> | 118.1(3)  | <i>119.6</i> | 119.2(3)  | <i>120.0</i> |
| O8–C7–C6       | 119.1(11) | <i>119.7</i> | 119.5(3)  | <i>119.5</i> | 119.5(3)  | <i>119.8</i> |
| O9–C10–C11     | 119.1(11) | <i>119.6</i> | 119.9(3)  | <i>119.6</i> | 119.5(3)  | <i>119.9</i> |
| C3–C4–N5       | 113.3(10) | <i>114.7</i> | 113.9(3)  | <i>114.8</i> | 114.4(3)  | <i>115.0</i> |
| C7–C6–N5       | 113.3(9)  | <i>114.7</i> | 114.1(3)  | <i>114.7</i> | 113.9(3)  | <i>114.9</i> |
| C10–C11–N5     | 113.3(9)  | <i>114.6</i> | 112.8(3)  | <i>114.8</i> | 113.7(3)  | <i>115.0</i> |
| C4–N5–C6       | 116.5(7)  | <i>117.1</i> | 114.7(2)  | <i>117.3</i> | 116.8(2)  | <i>117.4</i> |
| C4–N5–C11      | 116.5(7)  | <i>117.4</i> | 116.1(2)  | <i>117.0</i> | 116.8(2)  | <i>117.4</i> |
| C6–N5–C11      | 114.3(9)  | <i>117.1</i> | 117.4(2)  | <i>117.0</i> | 116.4(2)  | <i>117.7</i> |
| N5–Si1–C12     | 179.8(4)  | <i>179.6</i> | 178.2(1)  | <i>179.6</i> | 178.0(1)  | <i>179.5</i> |
| Si1–N5         | 2.329(9)  | <i>2.463</i> | 2.358(3)  | <i>2.451</i> | 2.411(3)  | <i>2.494</i> |
| ΔN             | 0.300(9)  | <i>0.357</i> | 0.292(4)  | <i>0.247</i> | 0.267(4)  | <i>0.230</i> |
| ΔSi            | 0.284(7)  | <i>0.243</i> | 0.286(3)  | <i>0.346</i> | 0.318(3)  | <i>0.372</i> |
| η <sub>e</sub> | 72.4      | <i>58.4</i>  | 72.2      | <i>60.9</i>  | 65.8      | <i>54.9</i>  |
| Σ(O–Si–O)      | 351.4(3)  | <i>346.9</i> | 351.3(1)  | <i>347.7</i> | 349.3(1)  | <i>345.8</i> |
| Σ(C–N–C)       | 347.4(7)  | <i>351.6</i> | 348.2(2)  | <i>351.3</i> | 350.0(2)  | <i>352.5</i> |
| Si–O–C–C       | -3.3(3)   | <i>11.5</i>  | -5.1(5)   | <i>10.1</i>  | -9.1(2)   | <i>11.6</i>  |
|                | 0.0(0)    | <i>11.8</i>  | 2.0(9)    | <i>10.4</i>  | -7.1(6)   | <i>11.9</i>  |

|          |         |       |         |       |         |       |
|----------|---------|-------|---------|-------|---------|-------|
|          | 3.3(3)  | 12.2  | -8.0(4) | 9.7   | -9.7(4) | 11.1  |
| O-C-C-N  | 2.0(8)  | 1.4   | 0.2(0)  | 1.6   | -0.7(6) | 1.6   |
|          | 0.0(0)  | 1.8   | -5.7(8) | 1.9   | -2.8(8) | 1.9   |
|          | -2.0(8) | 2.0   | 2.1(5)  | 1.2   | 0.0(8)  | 1.3   |
| C-C-N-Si | -0.4(6) | -8.0  | 2.7(7)  | -7.5  | 6.0(1)  | -8.1  |
|          | 0.0(0)  | -8.6  | 5.4(9)  | -7.9  | 7.3(3)  | -8.5  |
|          | 0.4(6)  | -9.0  | 2.2(3)  | -6.8  | 5.4(0)  | -7.5  |
| C-N-Si-O | -0.8(4) | 10.5  | -4.1(5) | 9.6   | -8.2(1) | 10.6  |
|          | 0.0(0)  | 11.1  | -3.7(0) | 10.1  | -8.5(6) | 11.0  |
|          | 0.8(4)  | 11.6  | -4.8(0) | 9.0   | -7.9(1) | 9.9   |
| N-Si-O-C | 2.2(2)  | -12.1 | 5.1(4)  | -10.9 | 9.5(7)  | -12.2 |
|          | 0.0(0)  | -12.7 | 1.1(7)  | -11.3 | 8.7(9)  | -12.7 |
|          | -2.2(2) | -13.2 | 6.9(2)  | -10.4 | 9.6(6)  | -11.6 |

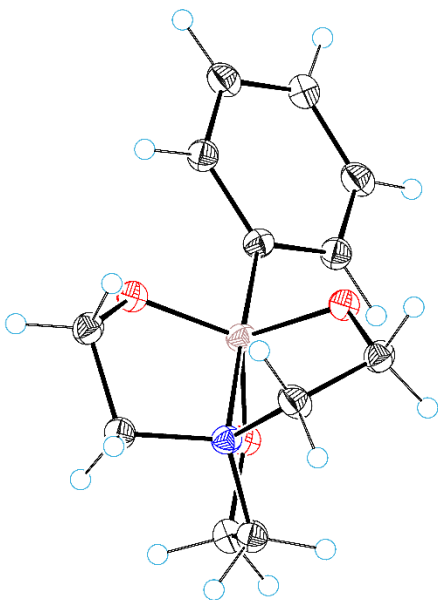

**Figure S5.** ORTEP drawing of phenylsilatrane (**1**) (first reported in [1]). Thermal ellipsoids are shown with 50% probability; hydrogen atoms are placed at a fixed distance using the riding model and shown as small spheres of arbitrary radii. The molecular structure of phenylsilatrane is practically the same for all three ( $\alpha$ ,  $\beta$ ,  $\gamma$ ) crystal modifications, only their crystal packaging being different.

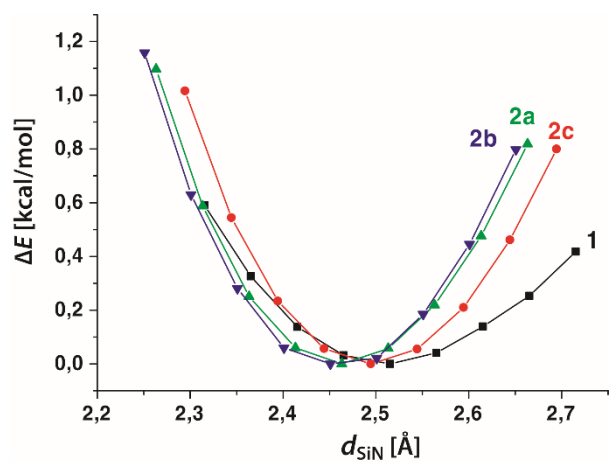

**Figure S6.** Potential functions of deformation of the N→Si bond in “common” silatrane Ph-Si(OCH<sub>2</sub>CH<sub>2</sub>)<sub>3</sub>N **1** and tribenzsilatranes **2a-c**.

## References

- [1] L. Parkanyi, K. Simon, J. Nagy, *Acta Crystallogr. Sec. B*, **1974**, *30*, 2328.
